# Supplementary material
Source: PubMed Central journal article supplement (PMC5488856)
Supplement: NIHMS867078-supplement-Appendix.pdf [file NIHMS867078-supplement-Appendix.pdf]

Appendix. Coefficient Estimates

Appendix Table 1. Coefficient Estimates from Two-Part Models of 3 and 6 Months Post-Injury Medical Expenditures, Nurses and Aides (95% Confidence Interval in Brackets)

|                                              | 3 Months                                    |                                             | 6 Months                                    |                                             |
|----------------------------------------------|---------------------------------------------|---------------------------------------------|---------------------------------------------|---------------------------------------------|
|                                              | (A)<br>Part One:<br>Coefficient<br>(N=2696) | (B)<br>Part Two:<br>Coefficient<br>(N=2250) | (A)<br>Part One:<br>Coefficient<br>(N=2696) | (B)<br>Part Two:<br>Coefficient<br>(N=2250) |
| Injured                                      | 0.78<br>[0.48, 1.07]                        | 0.08<br>[-0.05, 0.21]                       | 1.08<br>[0.67, 1.49]                        | 0.09<br>[-0.02, 0.20]                       |
| Quartile of previous<br>medical expenditures |                                             |                                             |                                             |                                             |
| 1 <sup>st</sup>                              | reference                                   | reference                                   | reference                                   | reference                                   |
| 2 <sup>nd</sup>                              | 1.42<br>[1.14, 1.70]                        | 0.18<br>[0.01, 0.35]                        | 0.89<br>[0.57, 1.21]                        | 0.25<br>[0.11, 0.39]                        |
| 3 <sup>rd</sup>                              | 1.98<br>[1.66, 2.31]                        | 0.50<br>[0.33, 0.67]                        | 1.83<br>[1.41, 2.26]                        | 0.75<br>[0.61, 0.89]                        |
| 4 <sup>th</sup>                              | 2.31<br>[1.95, 2.67]                        | 1.18<br>[1.01, 1.35]                        | 2.98<br>[2.31, 3.63]                        | 1.40<br>[1.26, 1.54]                        |
| Group health<br>insurance plan               |                                             |                                             |                                             |                                             |
| Premium                                      | reference                                   | reference                                   | reference                                   | reference                                   |
| Grandfathered                                | -1.03<br>[-1.47, -0.60]                     | 0.25<br>[-0.01, 0.51]                       | -1.36<br>[-1.86, -0.86]                     | 0.07<br>[-0.16, 0.29]                       |
| Value                                        | -0.15<br>[-0.72, 0.41]                      | -0.13<br>[-0.45, 0.20]                      | -0.05<br>[-0.65, 0.74]                      | -0.09<br>[-0.36, 0.18]                      |
| Age                                          |                                             |                                             |                                             |                                             |
| 22-29 years                                  | -0.11<br>[-0.48, 0.26]                      | -0.34<br>[-0.52, -0.17]                     | 0.25<br>[-0.23, 0.73]                       | -0.30<br>[-0.45, -0.15]                     |
| 30-39 years                                  | -0.23<br>[-0.54, 0.09]                      | -0.24<br>[-0.39, -0.09]                     | 0.09<br>[-0.31, 0.49]                       | -0.20<br>[-0.33, -0.07]                     |
| 40-49 years                                  | -0.54<br>[-0.84, -0.24]                     | -0.07<br>[-0.22, 0.09]                      | -0.33<br>[-0.70, 0.04]                      | -0.15<br>[-0.29, -0.02]                     |
| 50-77 years                                  | reference                                   | reference                                   | reference                                   | reference                                   |
| Job                                          |                                             |                                             |                                             |                                             |
| Nurse                                        | reference                                   | reference                                   | reference                                   | reference                                   |
| Aide                                         | -0.33<br>[-0.60, -0.06]                     | 0.09<br>[-0.05, 0.24]                       | -0.66<br>[-0.98, 1.75]                      | 0.06<br>[-0.06, 0.19]                       |
